# Supplementary material for: The effect of rhythm training on the motor coordination abilities of 8–12-year-old freestyle swimmers
Source: PeerJ. 2023 Jul 28;11:e15667. doi: 10.7717/peerj.15667 (PMC10389069; doi:10.7717/peerj.15667)
Supplement: Supplemental Information 2 — The original test results for each athlete and the difference between the pre-test and post-test (within group ES). [file peerj-11-15667-s002.xlsx]

## Sheet: Sheet1
ID	Group	Gender	Grade	training_experience	Age	Height_pre	Weight_pre	BMI_pre	WB_pre	JS_pre	25mFR_pre	IdC_pre	Height_post	Weight_post	BMI_post	WB_post	JS_post	25mFR_post	IdC_post	WB_change	JS_change	25mFR_change	IdC_change
001	EXP	female	2	1	7.9	136	26.3	14.2	43	38.5	20.44	0.035347	137	26.2	14	37	42.5	19.77	0.0341827	-0.580557	0.831348	-0.458392	-0.0196193
002	EXP	female	2	1	8.1	142	44.5	22.1	16	30.5	17.47	0.10781	143.5	45.6	22.1	27	39	16.83	0.358829	1.06435	1.76661	-0.437867	4.22977
003	EXP	female	2	1	7.3	127	23.6	14.6	40	36.5	20.99	0.148108	130.6	24.9	14.6	48	42.5	18.91	0.132286	0.774076	1.24702	-1.42307	-0.266622
004	EXP	female	2	1	7.8	131.5	24.5	14.2	27	39	19.98	0.121367	133.5	25.5	14.3	36	44	18.14	0.108655	0.870835	1.03918	-1.25887	-0.214203
005	EXP	female	2	1	8	129	31.5	18.9	45	34	20.7	0.169061	130.5	30.9	18.1	31	42.5	19.51	0.104185	-1.35463	1.76661	-0.81416	-1.09319
006	EXP	female	2	1	7.3	123	20.7	13.7	28	31.5	21.57	0.115533	125.5	22	14	24	38	20.24	0.152576	-0.387038	1.35094	-0.909943	0.624191
007	EXP	female	2	1	8	140.5	28.8	14.6	43	26.5	17.5	0.16873	141.5	29.3	14.6	37	44.5	17.04	0.147529	-0.580557	3.74106	-0.314717	-0.357238
008	EXP	female	2	1	7.7	120	20.6	14.3	42	32.5	17.9	0.179341	121.6	21.1	14.3	31	37.5	18.19	0.175769	-1.06435	1.03918	0.198409	-0.0601842
009	EXP	female	2	1	4.8	134	26.6	14.8	30	32	17.9	0.182134	134.8	27.2	15	32	45.5	18.86	0.126802	0.193519	2.8058	0.656801	-0.932368
010	EXP	female	2	1	6.5	130	28.7	17	34	31	18.2	0.219363	131.5	28	16.2	40	38.5	19.53	0.133987	0.580557	1.55878	0.909943	-1.43862
011	EXP	female	2	1	7.8	132	24.1	13.8	48	36.5	18	0.205756	133.5	25.6	14.4	47	45	17.99	0.242053	-0.0967595	1.76661	-0.00684168	0.61161
012	EXP	female	2	1	8	134.6	31.9	17.6	33	40.5	17.7	0.138529	134.6	31.9	17.6	36	42	16.27	0.134588	0.290278	0.311755	-0.97836	-0.0664051
013	CON	female	2	1	8	122	24.3	16.3	28	34.5	20.15	0.131071	124.7	24	15.4	19	34.5	21.59	0.162285	-0.870835	0	0.985202	0.525963
014	CON	female	2	1	7.8	131	29.4	17.1	38	38	21.57	0.030922	132.5	30.1	17.1	41	44	19.73	0.0148328	0.290278	1.24702	-1.25887	-0.271111
015	CON	female	2	1	7.9	131.5	29.6	17.1	45	33	20.41	0.0183293	133.1	28.5	16.1	37	41	19.78	0.0183578	-0.774076	1.6627	-0.431026	0.000481084
016	CON	female	2	1	7.9	137.2	29.2	15.5	19	25	21.48	0.0992457	141.2	31.1	15.6	17	32	21.35	0	-0.193519	1.45486	-0.0889418	-1.67233
017	CON	female	2	1	7.3	133.8	29.5	16.5	13	33	18.61	0.100196	135.2	30.2	16.5	23	35	19.37	0.124925	0.967595	0.415674	0.519968	0.416696
018	CON	female	2	1	7.4	132	27.1	15.6	16	31.5	17.1	0.20138	133.8	26.1	14.6	40	32.5	17.33	0.15784	2.32223	0.207837	0.157359	-0.73366
019	CON	female	2	1	7.7	130.5	27.1	15.9	36	28	18.4	0.213979	131	27.6	16.1	42	34	17.87	0.122401	0.580557	1.24702	-0.362609	-1.54314
020	CON	female	2	1	7.9	133	23.8	13.5	21	26.5	19.4	0.152855	134	24.4	13.6	23	34.5	19.31	0.112142	0.193519	1.6627	-0.0615751	-0.686029
021	CON	female	2	1	7.7	142.3	31.3	15.5	31	31	20.2	0.117408	144.8	32	15.3	19	37.5	18.5	0.181506	-1.16111	1.35094	-1.16309	1.08007
022	CON	female	2	1	7.8	129	22.9	13.8	34	29.5	19.8	0.195703	130.7	24.7	14.5	35	38.5	18.82	0.189216	0.0967595	1.87053	-0.670484	-0.109313
023	CON	female	2	1	7.2	124	20.6	13.4	24	21	18.8	0.216966	125	21.9	14	30	33	18.51	0.163568	0.580557	2.49404	-0.198409	-0.899773
024	EXP	male	2	1	7.9	126	25.7	16.2	47	43	20.39	0.157803	128	25.9	15.8	48	43.5	18.23	0.153789	0.105946	0.0836505	-1.12829	-0.0601741
025	EXP	male	2	1	7.8	133.2	26.8	15.1	22	36.5	19.43	0.0576256	134.2	27	15	29	50	19.45	0.017321	0.741625	2.25856	0.0104471	-0.604173
026	EXP	male	2	1	8	129.5	26.2	15.6	37	37	17.04	0.161877	131	26.7	15.6	29	41.5	16.89	0.134127	-0.847571	0.752854	-0.0783532	-0.41598
027	EXP	male	2	1	7	132.8	26.5	15	28	36.5	17.5	0.204609	134	26.8	14.9	42	45	17.8	0.170097	1.48325	1.42206	0.156706	-0.517332
028	EXP	male	2	1	8.1	131	32.5	18.9	33	20	17.1	0.177774	132	33.2	19.1	32	38.5	17.25	0.164539	-0.105946	3.09507	0.0783532	-0.198396
029	EXP	male	2	1	6.9	131.7	25.7	14.8	45	36	18.6	0.199978	133.3	26.2	14.7	34	38	19.1	0.187028	-1.16541	0.334602	0.261177	-0.194118
030	CON	male	2	1	7.9	131.5	31.8	18.4	34	33	21.43	0.135001	132	33	18.9	36	35.5	19.5	0.0926441	0.211893	0.418252	-1.00814	-0.634936
031	CON	male	2	1	7.9	141	28.5	14.3	24	43.5	20.41	0.109573	142.2	29.9	14.8	33	45.5	19.36	0.111617	0.953517	0.334602	-0.548473	0.0306384
032	CON	male	2	1	7.9	142.2	37.7	18.6	28	33	22.9	0	144.3	35.4	17	12	36.5	22.04	0.127944	-1.69514	0.585553	-0.449225	1.91791
033	CON	male	2	1	7.9	144	44.5	21.5	13	31.5	20.92	0.0489687	146.4	48.1	22.4	12	36.5	17.2	0.0721397	-0.105946	0.836505	-1.94316	0.347337
034	CON	male	2	1	7.8	132	24.9	14.3	33	32	22.59	0.115515	132.7	25.2	14.3	23	36	19.93	0.0666346	-1.05946	0.669204	-1.38946	-0.732732
035	CON	male	2	1	7.8	141	29.1	14.6	37	29.5	19.5	0.165008	141.5	31.3	15.6	33	41.5	16.64	0.12815	-0.423786	2.00761	-1.49393	-0.552509
036	CON	male	2	1	7.5	134	27.8	15.5	40	36.5	19.5	0.222887	134.5	28.3	15.6	39	42	18.3	0.190983	-0.105946	0.920155	-0.626826	-0.478252
037	EXP	female	3	2	8.3	129	24.1	14.5	39	43	17.4	0.0965828	130.5	25	14.7	48	47	16.91	0.193442	0.929693	1.4934	-0.651607	4.08586
038	EXP	female	3	2	8.6	129	22.6	13.6	48	41.5	17.07	0.105667	128.5	23.5	14.2	48	39.5	17.02	0.136919	0	-0.7467	-0.0664905	1.31832
039	EXP	female	3	2	8.5	140	34.5	17.6	37	40	16.73	0.0732412	140.5	34.7	17.6	35	41.5	16.16	0	-0.206598	0.560025	-0.757992	-3.08958
040	EXP	female	3	2	8.7	138	26.4	13.9	39	38	18.07	0.12702	138.4	27.6	14.4	38	43.5	17.33	0.207058	-0.103299	2.05342	-0.98406	3.37631
041	EXP	female	3	2	9	138.5	27.9	14.5	34	39	16.69	0.0966	138.5	28.3	14.8	43	41.5	15.75	0.177683	0.929693	0.933375	-1.25002	3.42037
042	CON	female	3	2	8.7	137.5	27.9	14.8	40	42	17.36	0.0762288	138.7	28.4	14.8	39	43.5	17.26	0.150675	-0.103299	0.560025	-0.132981	3.14042
043	CON	female	3	2	8.9	132	23.9	13.7	27	36.5	17.76	0.0489908	133.2	24.5	13.8	27	38	17.76	0.106685	0	0.560025	0	2.43375
044	CON	female	3	2	8.8	135.4	31.9	17.4	16	35.5	18.95	0.0989488	135.3	31.4	17.2	20	42.5	18.58	0.113423	0.413197	2.61345	-0.49203	0.61058
045	EXP	male	3	2	8.4	147.2	39.2	18.1	32	45	14.65	0.0564438	148.5	39.4	17.9	35	49	15.22	0.0341686	0.655521	0.441203	0.388168	-1.18289
046	EXP	male	3	2	8.9	139.5	32	16.4	39	49.5	16.34	0.0844595	141.5	32.6	16.3	27	46	15.72	0.129729	-2.62209	-0.386053	-0.422218	2.40398
047	EXP	male	3	2	8.9	141.5	31.1	15.5	28	44	17.78	0.0754545	144	31.6	15.2	29	43	17.26	0.0746269	0.218507	-0.110301	-0.354119	-0.0439526
048	EXP	male	3	2	9	137.3	28.8	15.3	34	43	16.22	0.0712617	140	29.5	15.1	39	45.5	17.28	0.140165	1.09254	0.275752	0.721857	3.65902
049	EXP	male	3	2	9	140.5	40.2	20.4	41	42.5	16.94	0.0814057	141.5	38.8	19.4	44	44.5	16.19	0.0728581	0.655521	0.220602	-0.510748	-0.453904
050	EXP	male	3	2	9	145.3	37.4	17.7	30	59.5	15	0.118984	145.9	38.7	18.2	41	48.5	15.44	0	2.40358	-1.21331	0.299639	-6.31844
051	CON	male	3	2	8.6	140.3	43	21.8	29	25	19.56	0.0772812	141.2	43.7	21.9	36	33.5	18.96	0.434515	1.52955	0.937557	-0.408598	18.9704
052	CON	male	3	2	9.1	141.4	29.4	14.7	29	39.5	15.96	0.0695867	142.6	31.6	15.5	36	45.5	15.35	0.378034	1.52955	0.661805	-0.415408	16.3796
053	CON	male	3	2	9.1	146	40.7	19.1	33	41.5	16.44	0.0549217	147	40.2	18.6	41	48	15.72	0.199296	1.74806	0.716955	-0.490318	7.66674
054	EXP	female	5	4	10.8	156	36.4	15	35	45	13.38	0.15991	157.2	38	15.4	44	48	13.06	0.102861	1.00144	1.07475	-0.389977	-2.30234
055	EXP	female	5	4	10.6	145.8	32.8	15.4	36	36	15.14	0.0869565	147.3	34.1	15.7	40	34.5	14.79	0.0437048	0.445086	-0.537373	-0.426537	-1.74552
056	EXP	female	5	4	10.8	149.5	36.5	16.3	36	41	14.05	0.148305	151	38.7	17	36	37	14.23	0.120318	0	-1.433	0.219362	-1.12946
057	EXP	female	5	4	10.5	151.4	38.5	16.8	22	36.5	14.25	0.151961	152.6	40.5	17.4	17	42	13.77	0.114715	-0.556357	1.97037	-0.584965	-1.50315
058	CON	female	5	4	11.1	145.5	32.8	15.5	42	37	15.12	0.115909	146	35	16.4	30	39.5	15.54	0.101111	-1.33526	0.895622	0.511845	-0.597211
059	CON	female	5	4	10.4	146.4	33.6	15.7	38	37	15.55	0.128049	148.3	35.4	16.1	46	36.5	15.16	0.113404	0.890172	-0.179124	-0.475284	-0.591028
060	CON	female	5	4	10.8	150	44	19.6	35	38	15.81	0.135417	150.5	44.4	19.6	39	40.5	15.63	0.140101	0.445086	0.895622	-0.219362	0.189048
061	CON	female	5	4	10.7	139.1	31.7	16.4	38	37.5	15.53	0.095339	140.5	33.1	16.8	48	45	15.97	0.0987958	1.11271	2.68687	0.536218	0.139507
062	CON	female	5	4	10.6	145.2	34.9	16.6	14	38.5	15.57	0.10566	146.6	35	16.3	33	41.5	15.39	0.103482	2.11416	1.07475	-0.219362	-0.0879142
063	CON	female	5	4	10.7	150	39.2	17.4	23	36	15.61	0.112971	151.8	41.5	18	28	34	16.66	0.0874231	0.556357	-0.716498	1.27961	-1.03103
064	EXP	male	5	4	10.9	142.1	36.7	18.2	32	42.5	14.01	0.157658	144	37.6	18.1	42	40.5	14	0.0863266	1.23929	-0.451466	-0.0133965	-1.92906
065	EXP	male	5	4	10.5	151	45.2	19.8	39	40.5	14	0.143939	151.9	44.9	19.5	39	36.5	14.16	0.101676	0	-0.902932	0.214343	-1.14297
066	EXP	male	5	4	10.7	149.1	40.4	18.2	16	30.5	14.4	0.0705128	149.5	40.5	18.1	21	28.5	14.08	0.0878199	0.619644	-0.451466	-0.428687	0.46805
067	EXP	male	5	4	10.5	152	37.8	16.4	32	42	14.37	0.129482	152	38.7	16.8	39	41	14.13	0.0838504	0.867502	-0.225733	-0.321515	-1.23405
068	CON	male	5	4	11	154	46.5	19.6	33	42.5	15.22	0.120833	155.3	48.3	20	20	41	15.01	0.118117	-1.61108	-0.3386	-0.281326	-0.0734537
069	CON	male	5	4	11.1	151	40.1	17.6	42	34.5	14.67	0.122573	152	41.3	17.9	48	34	14.78	0.118814	0.743573	-0.112867	0.147361	-0.101662
070	CON	male	5	4	10.1	149	45.4	20.4	23	33.5	14.37	0.0956522	150.3	43.6	19.3	35	36.5	14.7	0.0983718	1.48715	0.677199	0.442083	0.0735483
071	CON	male	5	4	11.1	149	36.7	16.5	35	37.5	14.85	0.171162	149.5	38	17	37	43.5	15.17	0.157867	0.247858	1.3544	0.428687	-0.359529
072	CON	male	5	4	11	149	46.4	20.9	37	35.5	16.4	0.0634921	149.5	43.2	19.3	44	39.5	16.24	0.0838813	0.867502	0.902932	-0.214343	0.551402
excluded	EXP	female	3	2	8.8	142	32.7	16.2	20	38.5	17.64		144.4	34.1	16.4	29	42	16.62	0.0960904
excluded	CON	male	3	2	8.7	138.5	39.9	20.8	33	30.5	17.97		140	39	19.9	30	42.5	19.15
excluded	CON	male	3	2	9	147	42.2	19.5	18	32	19.29		148.5	42.6	19.3	22	36	19.2
excluded	CON	male	3	2	8.3	141	32.9	16.5	35	42	18.89		142	33.3	16.5	35	42	18.89
excluded	CON	female	3	2	9.4	135.6	29.2	15.9	24	34.5	18.81		136	31.6	17.1	27	35	18.81
excluded	CON	female	3	2	8.9	126.5	23	14.4	46	35	18.55		127	24.4	15.1	44	37.5	18.55
excluded	EXP	male	5	4	10.4	154	41.2	17.4	17	40.5	13.79	0.204348	155	40	16.6	26	45.5	13.28
excluded	EXP	female	5	4	11	164	40	14.9	39	43	14.52	0.12875
